# Supplementary material for: ZnS–rGO/CNF Free-Standing Anodes for SIBs: Improved Electrochemical Performance at High C-Rate
Source: MDPI journal article supplement (doi:10.3390/nano13071160), 2023-03-24
Supplement: s1 [file s1]

# **ZnS-rGO/CNF free-standing anodes for SIBs: improved electrochemical performance at high C-rate**

**Debora Maria Conti <sup>1</sup>, Cristina Fusaro <sup>1</sup>, Giovanna Bruni <sup>1</sup>, Pietro Galinetto <sup>2</sup>, Benedetta Albini <sup>2</sup>, Chiara Milanese <sup>1</sup>, Vittorio Berbenni <sup>1</sup>, Doretta Capsoni <sup>1,\*</sup>**

<sup>1</sup> Department of Chemistry, Physical Chemistry Section & C.S.G.I. (Consorzio Interuniversitario per lo Sviluppo dei Sistemi a Grande Interfase), University of Pavia, 27100 Pavia, Italy; [deboramaria.conti01@universitadipavia.it](mailto:deboramaria.conti01@universitadipavia.it) (D.M.C.); [cristina.fusaro01@universitadipavia.it](mailto:cristina.fusaro01@universitadipavia.it) (C.F.); [giovanna.bruni@unipv.it](mailto:giovanna.bruni@unipv.it) (G.B.); [chiara.milanese@unipv.it](mailto:chiara.milanese@unipv.it) (C.M.); [vittorio.berbenni@unipv.it](mailto:vittorio.berbenni@unipv.it) (V.B.)

<sup>2</sup> Department of Physics, University of Pavia, 27100 Pavia, Italy; [pietro.galinetto@unipv.it](mailto:pietro.galinetto@unipv.it) (P.G.); [benedetta.albini01@universitadipavia.it](mailto:benedetta.albini01@universitadipavia.it) (B.A.)

\* Correspondence: [doretta.capsoni@unipv.it](mailto:doretta.capsoni@unipv.it) (D.C.) Tel.: +39-0382-987213

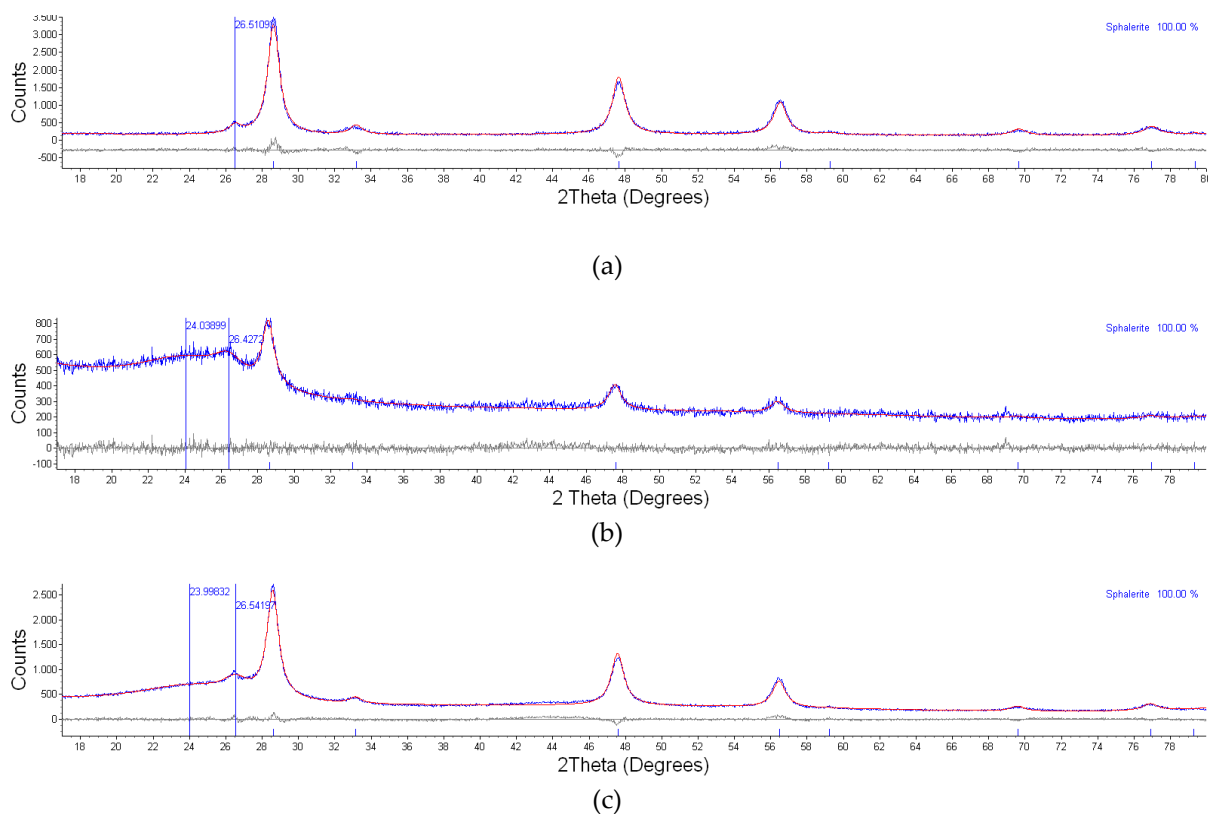

**Figure S1.** Rietveld refinement of the X-ray diffraction data of the a) ZnS-GO, b) 10%ZnS-GO/CNF and c) 30%ZnS-GO/CNF samples. Experimental pattern (blue line), calculated pattern (red line), difference curve (gray line). Peaks position of the sphalerite phase (bottom: blue bars). Peaks position of the (0 0 2) plane of graphene and of the amorphous carbon (blue vertical lines).

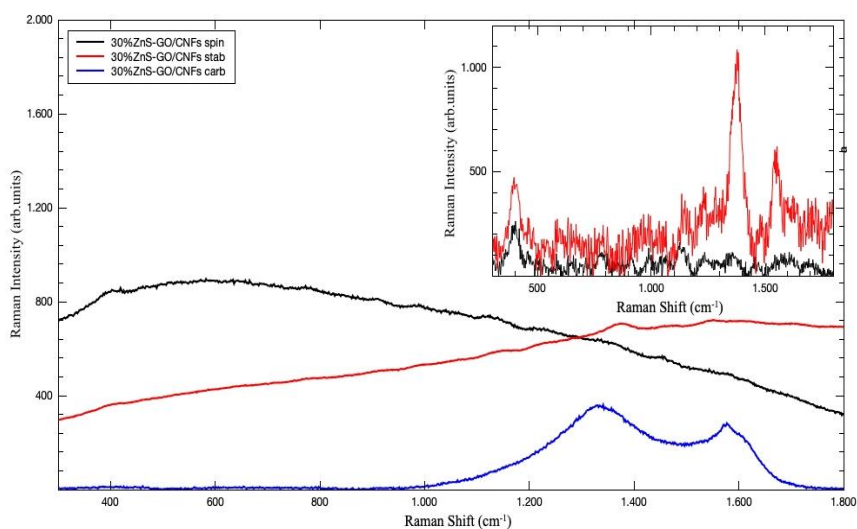

**Figure S2.** Room temperature Raman spectra for the sample 30%ZnS-GO/CNF as obtained after electrospinning (black line), after stabilization (red line) e post carbonization process (blue line). The inset shows the first two spectra as derived after baseline subtraction using a polynomial curve.

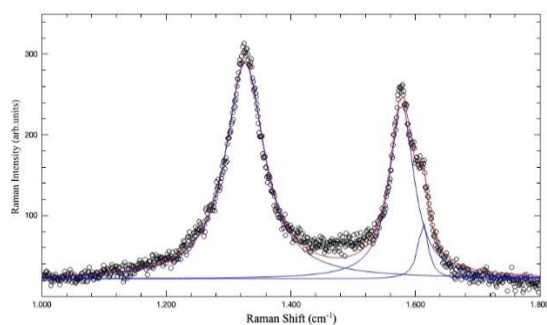

**Figure S3.** Result from best-fitting procedure (red line) performed in the range 1000-1800  $\text{cm}^{-1}$  on the Raman data (empty circle) from Zn-GO sample using a sum of 3 lorentzian curves (blue lines). From the fitting parameters the values for ( $I_G/I_D$ ) have been derived.

**Table S1.** Lattice parameters, crystallite size, weighted discrepancy factor and Goodness of Fit obtained by the Rietveld refinement of the diffraction data of the ZnS-GO, 10%ZnS-GO/CNF, 30%ZnS-GO/CNF samples.

| SAMPLE                             | ZnS-GO    | 10%ZnS-GO/CNF | 30%ZnS-GO/CNF |
|------------------------------------|-----------|---------------|---------------|
| <b>a (<math>\text{\AA}</math>)</b> | 5.3947(7) | 5.3961(32)    | 5.3986(7)     |
| <b>Crystallite size (nm)</b>       | 11.8      | 11.7          | 11.7          |
| <b>R<sub>wp</sub></b>              | 9.7       | 6.2           | 5.4           |
| <b>GoF</b>                         | 1.7       | 1.1           | 1.1           |
